# Supplementary material for: Zinc finger genes Fezf1 and Fezf2 control neuronal differentiation by repressing Hes5 expression in the forebrain
Source: Oxford University Press journal article supplement (doi:10.1242/dev.047167), 2010-04-29
Supplement: dev047167tables1.pdf [file dev047167tables1.pdf]

**Table S1. Microarray data**

| Expression level (ratio to control)                                                                        | Abbreviation of gene name | Gene name                                                                                         | Accession number |
|------------------------------------------------------------------------------------------------------------|---------------------------|---------------------------------------------------------------------------------------------------|------------------|
| <b>(A) Genes upregulated in <i>Fezf1<sup>-/-</sup>Fezf2<sup>-/-</sup></i> rostral forebrain at E9.5</b>    |                           |                                                                                                   |                  |
| 0.111782                                                                                                   | <i>Lhx8</i>               | LIM homeobox protein 8                                                                            | D49658.1         |
| 0.258314                                                                                                   | <i>Hes5</i>               | hairy and enhancer of split 5                                                                     | BB561515         |
| 0.278592                                                                                                   | <i>3830406C13Rik</i>      | RIKEN cDNA 3830406C13 gene                                                                        | BB763097         |
| 0.37488                                                                                                    | <i>Crym</i>               | crystallin                                                                                        | NM_016669.1      |
| 0.380651                                                                                                   | <i>LOC382156</i>          | similar to F-box- and WD40-repeat-containing protein                                              | BM229128         |
| 0.400377                                                                                                   | <i>Dchs1</i>              | dachsous 1                                                                                        | AK014167.1       |
| 0.408742                                                                                                   | <i>Igf1</i>               | insulin-like growth factor 1                                                                      | BG075165         |
| 0.4099378                                                                                                  | <i>Prkab2</i>             | protein kinase, AMP-activated, beta 2 non-catalytic subunit                                       | AV223660         |
| 0.4137254                                                                                                  | <i>Synpo</i>              | synaptopodin                                                                                      | BB426294         |
| 0.43194                                                                                                    | <i>Insm1</i>              | insulinoma-associated 1                                                                           | BB468410         |
| <b>(B) Genes downregulated in <i>Fezf1<sup>-/-</sup>Fezf2<sup>-/-</sup></i> rostral forebrain at E9.5</b>  |                           |                                                                                                   |                  |
| 10.58017                                                                                                   | <i>Psmc6</i>              | proteasome 26S subunit, non-ATPase, 6                                                             | BC006869.1       |
| 7.842105                                                                                                   | <i>Cnm3</i>               | Cyclin M3                                                                                         | BB236001         |
| 2.625724                                                                                                   | <i>3110069A13Rik</i>      | RIKEN cDNA 3110069A13 gene                                                                        | AK014242.1       |
| 2.501182                                                                                                   | <i>Strbp</i>              | Spermatid perinuclear RNA binding protein                                                         | W488249          |
| 2.341556                                                                                                   | <i>Ramp2</i>              | Ramp2                                                                                             | BF537798         |
| 2.126619                                                                                                   | <i>Wbscr1</i>             | Williams-Beuren syndrome chromosome region 1 homolog                                              | AU018978         |
| 2.104                                                                                                      | <i>Lhx5</i>               | LIM homeobox protein 5                                                                            | NM_008499.1      |
| 2.08                                                                                                       | <i>Plekha2</i>            | pleckstrin homology domain-containing, family A member 2                                          | BC010215.1       |
| 2.039887                                                                                                   | <i>Tcf3</i>               | transcription factor 3                                                                            | BE994269         |
| <b>(C) Genes upregulated in <i>Fezf1<sup>-/-</sup>Fezf2<sup>-/-</sup></i> rostral forebrain at E10.5</b>   |                           |                                                                                                   |                  |
| 0.305256065                                                                                                | <i>3830406C13Rik</i>      | RIKEN cDNA 3830406C13 gene                                                                        | BB763097         |
| 0.307469181                                                                                                | <i>Cnm3</i>               | Cyclin M3                                                                                         | BB236001         |
| 0.307507508                                                                                                | <i>Arnt</i>               | aryl hydrocarbon receptor nuclear translocator                                                    | AV233793         |
| 0.31530782                                                                                                 | <i>Smarb1</i>             | SWI/SNF related, matrix associated, actin dependent regulator of chromatin, subfamily b, member 1 | AV310148         |
| 0.31838565                                                                                                 | <i>Usp7</i>               | Ubiquitin specific peptidase 7                                                                    | AW548146         |
| 0.326007326                                                                                                | <i>Aldh1a3</i>            | aldehyde dehydrogenase family 1, subfamily A3                                                     | NM_053080.1      |
| 0.327475103                                                                                                | <i>1810014B01Rik</i>      | RIKEN cDNA 1810014B01 gene                                                                        | AK017634.1       |
| 0.332063492                                                                                                | <i>Rpl27a</i>             | ribosomal protein L27a                                                                            | BG141806         |
| 0.335905711                                                                                                | <i>Hes5</i>               | hairy and enhancer of split 5                                                                     | BB561515         |
| 0.349477683                                                                                                | <i>Tmem69</i>             | transmembrane protein 69                                                                          | BB824992         |
| <b>(D) Genes downregulated in <i>Fezf1<sup>-/-</sup>Fezf2<sup>-/-</sup></i> rostral forebrain at E10.5</b> |                           |                                                                                                   |                  |
| 8.68330362                                                                                                 | <i>Psmc6</i>              | proteasome 26S subunit, non-ATPase, 6                                                             | BC006869.1       |
| 3.470720721                                                                                                | <i>Arf5</i>               | ADP-ribosylation factor 5                                                                         | NM_007480.1      |
| 2.570723684                                                                                                | <i>Neurog2</i>            | neurogenin 2                                                                                      | NM_009718.1      |
| 2.348777349                                                                                                | <i>Ptprz1</i>             | protein tyrosine phosphatase, receptor type Z, polypeptide 1                                      | BC002298.1       |
| 2.009538951                                                                                                | <i>2610017109Rik</i>      | RIKEN cDNA 2610017109 gene                                                                        | AW045679         |
| <b>(E) Genes upregulated in <i>Fezf1<sup>-/-</sup>Fezf2<sup>-/-</sup></i> rostral forebrain at E12.5</b>   |                           |                                                                                                   |                  |
| 0.24166203                                                                                                 | <i>Dbx1</i>               | developing brain homeobox 1                                                                       | AI426026         |
| 0.25706371                                                                                                 | <i>Irx5</i>               | Iroquois related homeobox 5                                                                       | NM_018826.1      |
| 0.28139535                                                                                                 | <i>Tcf7l2</i>             | transcription factor 7-like 2, T-cell specific, HMG-box                                           | AF107298.1       |
| 0.28937117                                                                                                 | <i>Irx2</i>               | Iroquois related homeobox 2                                                                       | AF295369.1       |
| 0.30982019                                                                                                 | <i>Shox2</i>              | short stature homeobox 2                                                                          | AV332957         |
| 0.32046332                                                                                                 | <i>Irx3</i>               | Iroquois related homeobox 3                                                                       | NM_008393.1      |
| 0.32054674                                                                                                 | <i>Evi1</i>               | ecotropic viral integration site 1                                                                | AI647591         |
| 0.35974026                                                                                                 | <i>Ebf3</i>               | early B-cell factor 3                                                                             | AK014058.1       |
| 0.38888889                                                                                                 | <i>Irx1</i>               | Iroquois related homeobox 1                                                                       | AF165984.1       |
| 0.39520028                                                                                                 | <i>Fgf15</i>              | fibroblast growth factor 15                                                                       | NM_008003.1      |

List of genes, the expression of which was downregulated or upregulated in *Fezf1<sup>-/-</sup>Fezf2<sup>-/-</sup>* rostral forebrains at E9.5, E10.5 or E12.5 in comparison with wild-type rostral forebrains. The genes were selected according to the following criteria: (1) they display two-fold or more change in signal value between wild-type and *Fezf1<sup>-/-</sup>Fezf2<sup>-/-</sup>* rostral forebrains, (2) the signal intensities of the higher value should be greater than 100, and (3) the top-ten genes are shown in tables and raw data have been deposited in Gene Expression Omnibus (GEO) under the accession number GSE21156.
